1  
2  
3  
4  
5  
6  
7  
8  
9  
10  
11  
12  
13  
14  
15  
16  
17  
18  
19  
20  
21  
22  
23  
24  
25

## Latent Structure of Risk Perception

Elisa Pabon<sup>a\*</sup>

epabon@uchicago.edu

James MacKillop<sup>b</sup>

jmackill@mcmaster.ca

Abraham A. Palmer<sup>c,d</sup>

[orcid.org/0000-0003-3634-0747](https://orcid.org/0000-0003-3634-0747)

aapalmer@ucsd.edu

Harriet de Wit<sup>a</sup>

hdew@uchicago.edu

<sup>a</sup> Department of Psychiatry and Behavioral Neuroscience, University of Chicago, Chicago, IL 60637, USA

<sup>b</sup> Peter Boris Centre for Addictions Research McMaster University/St. Joseph's Healthcare  
Hamilton, Hamilton, ON L8P 3R2, Canada

<sup>c</sup> Department of Psychiatry, University of California San Diego, La Jolla, CA 92093, USA

<sup>d</sup> Institute for Genome Medicine, University of California San Diego, La Jolla, CA 92093, USA

\*corresponding author

26 **Abstract**

27 Risk-taking behavior affects many aspects of life, including maladaptive behaviors such  
28 as illicit substance use, unsafe driving, and risky sexual behavior. Risk-taking has been measured  
29 using both self-report measures and behavioral tasks designed for the purpose, but there is little  
30 consensus in the associations among measures and our understanding of the latent constructs  
31 underlying different forms of risk is limited. In the present study we examined the construct of  
32 risk using data from over 1000 young adults who completed measures of risk-taking, including  
33 self-reports of perception of risk, propensity to engage in risky behaviors and performance on  
34 behavioral tasks designed to measure risk. To examine the latent structure of risk preferences, we  
35 conducted a principal component analysis (PCA). The PCA revealed a latent structure of three  
36 distinct components of risk-taking behavior: “*Lifestyle Risk Sensitivity*”, “*Financial Risk*  
37 *Sensitivity*”, and “*Behavioral Risk Sensitivity*”, which consisted only of the Balloon Analogue  
38 Risk Task (BART; Lejuez et al., 2002). As expected, risk-taking and perception of risk differed  
39 in men and women. Yet, the PCA components were similar in men and women. Future work  
40 utilizing additional measures of risk-taking behavior in more heterogeneous samples will help to  
41 identify the true biobehavioral constructs underlying these behaviors.

42 **Keywords**

43 Risk, Probability Discounting, Balloon Analogue Risk Task, Principal Components Analysis

## 44 **1. Introduction**

45 Many of life's decisions focus on opportunities to gain some reward but with the  
46 possibility of a potential loss or other possible harm (Leigh et al. 1999). Such decisions are  
47 commonly referred to as 'risk-taking behaviors', typically involving voluntary engagement in  
48 reward-seeking activities that are probabilistically linked to monetary, social or interpersonal loss  
49 (Bechara, 2003). Until recently, risk-taking was considered to be a relatively discrete personality  
50 trait, and individuals would be categorized as risk-taking or risk averse (Eysenck & Eysenck,  
51 1977; Bromiley & Curley, 1992; Lejuez et al., 2002). For example, a recent genetic study, which  
52 included over one million individuals, utilized a single item to assess risk tolerance, in essence  
53 "Would you describe yourself as someone who takes risks? Yes / No" (Linnér et al., 2018)  
54 However, further empirical evidence suggests that risk-taking may not be a unitary construct, but  
55 instead multidimensional, and vary across domains, including financial, ethical and social  
56 (Duijvenvoorde et al. 2015, Zuckerman and Kuhlman, 2000; Blais and Weber, 2001, Horvath  
57 and Zuckerman, 1993).

58 In a recent study, Frey et al (2017) summarize the challenges in studying 'risk' as a  
59 construct, including questions of whether the tendency to take risks is unitary or  
60 multidimensional, or stable or changeable. They note that risk is defined differently by  
61 economists and by psychologists, and that it may refer to self-described propensity measures  
62 (e.g., personality measures), to objective behavioral tendencies in tasks specifically design to  
63 assess risk (e.g., the Balloon Analogue Risk Task) or to reports of habitual behaviors that would  
64 be categorized as risky (e.g., smoking). Presenting findings using 39 different risk-taking  
65 measures, they found evidence for a stable risk trait based on propensity and habit measures, but  
66 not behavioral tasks.

67           In the present study we further examine the construct of risk using data from a relatively  
68 large cohort of young adults who completed several common measures of risk-taking. In our  
69 study, we obtained several measures of risky behavior, including self-reports of perception of  
70 risk and propensity to engage in risky behaviors and performance on behavioral tasks purported  
71 to measure risk. We included three self-report questionnaires assessing perception of and  
72 propensity to take risks. These included the Survey of Consumer Finances Investment Risk  
73 Question (SCF IRQ; Aizcorbe et al., 2003), a single self-report question asking how much an  
74 individual is willing to risk financially, the Domain-Specific Risk-Taking Scale (DOSPERT;  
75 Blais & Weber et al. 2006), a multi-dimensional questionnaire assessing likelihood to engage in  
76 several other domain-specific risky activities, such “revealing a friend’s secret to someone else”,  
77 “driving a car without a seatbelt”, etc., and the Probability Choice Questionnaire (PCQ; Madden  
78 et al., 2010), which is a shorter measure that assesses self-reported preferences for smaller  
79 certain rewards over probabilistic larger rewards. Additionally, we included two behavioral  
80 tasks, one assessing choices between certain and probabilistic monetary rewards and one a  
81 designated risk-taking task. The Probability Discounting Task (PDT; Richards et al. 1997) is a  
82 behavioral task measuring actual choices between certain and uncertain (larger) rewards in a  
83 series of dichotomous choices (i.e., probability discounting behavior). The behavioral PDT and  
84 self-report PCQ assess the same underlying construct (probability discounting), but one involves  
85 behavioral choices and the other self-reported choices. The second behavioral task was the  
86 Balloon Analogue Risk Task (BART; Lejuez et al., 2002), which is a task designed to measure  
87 willingness to take monetary risk at the expense of a possible loss via inflating a simulated  
88 balloon on a computer screen. Across trials, participants may gain points with increasing risk of  
89 exploding the balloon and losing these points.

90 To examine the latent structure of risk preferences, we conducted a principal components  
91 analysis (PCA) to evaluate the relationship among the SCF IRQ, DOSPERT, PDT, PCQ and the  
92 BART to reveal the factor structure underlying the risk construct, and to determine how risk  
93 taking differs across domains. We used an exploratory approach (PCA) because relatively few  
94 studies have previously investigated the latent structure of risk preferences. Confirmatory factor  
95 analysis would have been more appropriate if we had specific *a priori* prediction about the  
96 nature of the structure (cf. MacKillop et al., 2016). In addition, we used PCA to examine the  
97 latent structure of all variance, not just shared variance, because we expected that risk  
98 preferences would be multi-faceted in nature. Furthermore, sex differences in risk taking  
99 behavior, across multiple domains, have been seen and replicated for decades (Fatkin et al.,  
100 1985; Powell et al., 1997; Pawlowski et al., 2008; Charness et al., 2012). Thus, we also analyzed  
101 males and females within our sample separately to account for these differences and to determine  
102 the extent to which they may influence the underlying latent structure of risk taking behaviors.  
103 Finally, a unique feature of the study was an intentional emphasis on enrolling young adults with  
104 limited involvement with drugs of abuse. Persistent substance use has been shown to lead to  
105 greater risk taking (Nasrallah et al., 2009). Therefore, using participants with non-problem drug  
106 use reduced the likelihood of either residual or long-term effects.

## 107 **2. Methods**

### 108 *2.1 Participants*

109 Healthy men and women (N=1058) aged 18-31 were recruited at two sites (Athens, GA and  
110 Chicago, IL) through online and printed advertisements. Online screening identified individuals  
111 who were fluent in English, had completed up to high school education, had taken no psychiatric  
112 medications in the last year, and reported no current psychiatric treatment. During the in-person

113 visit we verified alcohol sobriety via breathalyzer (Alco-sensor III or IV; Intoximeters, St. Louis,  
114 MO) and lack of recent drug use via urine drug screen (ToxCup, Branan Medical Co. Irvine, CA  
115 and iCup, Alere North America, LLC, Orlando, FL), Participants also completed the Alcohol  
116 Use Disorder Identification Test (AUDIT) (Babor et al. 2001) and Drug Use Disorder  
117 Identification Test (DUDIT) (Berman et al. 2005), and were only included if they scored 11 or  
118 below to exclude problem drug users. The study was approved by the Institutional Review  
119 Boards of the University of Chicago and the University of Georgia, and all participants provided  
120 informed consent.

121

## 122 *2.2 Procedures*

123 Participants attended a single experimental session during which they completed self-report and  
124 behavioral measures. Participants were instructed to abstain from alcohol and drugs other than  
125 their usual amounts of caffeine and nicotine for 24 hours before the visit. Individuals with  
126 positive drug tests were excluded. The measures reported here were part of a larger battery of  
127 tasks described elsewhere (MacKillop et al. 2016). The tasks were presented in counterbalanced  
128 order, with two five-minute breaks during the 4-hour session. The present analysis consists of  
129 both self-report and behavioral indices of risk-taking (listed below). After completion of the  
130 study, participants were debriefed and compensated for their time. Participants were either paid  
131 \$40 or received research participation credits, and also had a one in six chance of receiving an  
132 outcome from one of the other assessments (Kirby et al. 1999).

133

## 134 *2.3 Self-report Measures*

135 **Survey of Consumer Finances Investment Risk Question (SCF IRQ)** (Aizcorbe et al., 2003)

136 The SCF IRQ measures financial risk-taking behavior. The single multiple-choice question asks,  
137 “which of the statements below comes closest to the amount of financial risk that you are willing  
138 to take when you save or make investments?” Possible responses included: (1) Substantial  
139 financial risks expecting to earn substantial returns, (2) Above-average financial risks expecting  
140 to earn above-average returns, (3) Average financial risks expecting to earn average returns, (4)  
141 No financial risks. This question is included in a survey sponsored by the Federal Reserve Board  
142 in cooperation with the U.S. Department of the Treasury (Grable et al. 1999).

143

144 **Domain-Specific Risk-Taking Scale (DOSPERT)** (Blais & Weber, 2006)

145 The DOSPERT measures risk attitudes in six commonly encountered content risk domains  
146 (ethical, gambling, health/safety, investing, recreational, and social). It is a 48-item questionnaire  
147 that assesses likelihood to engage in domain-specific risky activities, as well as perceptions of  
148 the magnitude of the risks. Sample items include “Having an affair with a married man/woman”,  
149 “Investing 10% of your annual income in a new business venture” and “Driving a car without a  
150 seatbelt”. A 7-point rating scale ranging from 1 (Extremely Unlikely) to 7 (Extremely Likely)  
151 was used to assess likelihood to engage in the stated risky behavior. Item ratings were added  
152 across all items of a given subscale to obtain subscale scores. Higher scores indicate greater risk  
153 taking in the domain of the subscale. The risk-perception assessment used the same set of items  
154 but instead included a 7-point rating scale ranging from 1 (Not at all) to 7 (Extremely Risky).  
155 Item ratings were added across all items of a given subscale to obtain subscale scores, with  
156 higher scores suggesting perceptions of greater risk in the domain of the subscale.

157

158 **Probability Choice Questionnaire (PCQ)** (Madden et al., 2010)

159 The PCQ measures probability discounting behavior. Participants are instructed to answer 30  
160 questions by circling their preference between two outcomes, a smaller amount of money  
161 delivered “for sure” and a probabilistic larger amount, in no particular order. For example, one  
162 item asks participants “Would you rather have \$20 for sure or a 1-in-10 chance (10%) of winning  
163 \$80”. Each probability reflects predetermined discounting functions, which permit inferring a  
164 value for the parameter  $h$ .

165

#### 166 *2.4 Behavioral tasks*

##### 167 **Probability Discounting Task** (Richards et al. 1997)

168 The PDT measures the relative value of certain vs probable consequences. A computerized  
169 procedure was used to present choices in which participants repeatedly chose between \$100 with  
170 a probability (1.0, 0.9, 0.75, 0.5 and 0.25) and a smaller, certain amount. Indifference points, at  
171 which two options are perceived as equal in value to an individual, are used to plot discount  
172 curves. The curve represents the rate of the probability discounting and is best characterized by a  
173 hyperbolic model. The hyperbolic discount functions for probability discounting are calculated  
174 as follows:

$$V = \frac{A}{1 + h\theta}, \theta = \frac{1}{P} - 1$$

175 The  $V$  represents the subjective value (the certain smaller amount of money), the  $A$  represents  
176 the larger amount money (\$100). The  $P$  represents the probability of receiving the money, the  $\theta$   
177 stands for odds against receiving the money, and the  $h$  represents the rate of discounting as a  
178 function of decreasing probability. Lower  $h$  values represent a less rapid rate of discounting  
179 based on increasing odds against, reflecting riskier options.



180  
181  
182  
183  
184  
185  
186  
187  
188  
189  
190  
191  
192  
193  
194  
195  
196  
197  
198  
199  
200  
201  
202

**Balloon Analogue Risk Task (BART)** (Lejuez et al., 2002)

The BART is a validated behavioral measure of risk taking (Hunt et al., 2005, Lejuez et al., 2007). Participants view a balloon on a screen, which can be increased in size with a key press. Each key press increases the balloon size and increases a counter on the screen, with points redeemable for money. However, as the balloon increases in size the probability that it will explode also increases, at which time all accumulated points are lost. The subject can make an alternative response to stop pumping before the balloon explodes and redeem the points. Thus, this task provides a measure of willingness to take risk, at the expense of a possible loss. The adjusted average number of pumps on unexploded balloons is the indicator of risk.

*2.5 Data Analysis*

Initially, for all measures, distributions were examined, and log transformations were performed when necessary to normalize skewed data. Sex differences across all measures were determined. Then, internal reliability and correlations between measures and their subscales were evaluated. Finally, the latent structure of the measures of risk taking was examined using principal components analysis (PCA). To identify related latent factors, the PCA used an oblique rotation (direct oblimin,  $\delta = 0$ ), permitting correlated components. Two criteria were used to determine the appropriate number of components to retain: eigenvalues  $> 1$ , and scree plot discontinuity. Significant loadings were defined as  $>|.30|$  on the pattern matrix. All data analysis was performed in SPSS (v24).

203  
204  
205  
206  
207  
208  
209  
210  
211  
212  
213  
214  
215  
216  
217  
218  
219  
220  
221  
222  
223  
224  
225

### **3. Results**

#### ***3.1 Participant Characteristics***

The participants were mostly young men and women of European-ancestry with about 2 years of college education (Table 1).

#### ***3.2 Self-Report & Behavioral Measures***

Subjects' mean and standard deviations for each of the outcome measures (DOSPERT subscale scores,  $h$  values, and mean unexploded balloons adjusted) are listed in Table 1. These values are within the normative range reported for the DOSPERT (Blais & Weber, 2006), the probability discounting task (Richards et al. 1997), the probability choice questionnaire (Madden et al., 2010) and the BART (Lejuez et al., 2002). Women and men differed on all DOSPERT subscales except social risk-taking behavior, on both the probability task and questionnaire, but not on the BART. Females perceived all domains of the DOSPERT risk-taking subscales, except social, to be significantly riskier than males, but all scored significantly lower on likelihood to take the risks in all domains in comparison to males (Table 1). Additionally, because of these observed sex differences, we conducted the primary analyses in separate phases, first for the entire sample, then adjusted for sex and finally separately for females and males.

226

227

228 **Table 1.**

|                                                                                            | <b>Males</b>  | <b>Females</b>  | <b>Full Sample</b> |
|--------------------------------------------------------------------------------------------|---------------|-----------------|--------------------|
| <b>N</b>                                                                                   | 398           | 660             | 1058               |
| <b>Age</b>                                                                                 | 21.5 (0.16)   | 20.92 (0.118)   | 21.14 (0.1)        |
| <b>Race</b>                                                                                |               |                 |                    |
| Caucasian                                                                                  | 79.1%         | 79.4%           | 79.5%              |
| African American                                                                           | 6.8%          | 7.4%            | 7.2%               |
| Asian                                                                                      | 8.5%          | 8.5%            | 8.5%               |
| Other                                                                                      | 5.1%          | 4.7%            | 4.9%               |
| <b>Years of Education</b>                                                                  | 14.3 (0.11)   | 14.17 (0.081)   | 14.22 (0.066)      |
| <b>DOSPERT (Cronbach's alpha, # items)</b>                                                 |               |                 |                    |
| Ethical Perception (0.701, 6)                                                              | 26.74 (6.03)  | 28.79 (6.04)**  | 28.02 (0.19)       |
| Financial Perception (0.779, 6)                                                            | 29.35 (5.81)  | 31.21 (6.19)**  | 30.51 (0.19)       |
| Health/Safety Perception (0.728, 6)                                                        | 27.68 (5.77)  | 30.64 (5.93)**  | 29.53 (0.19)       |
| Recreational Perception (0.660, 6)                                                         | 22.84 (6.45)  | 25.30 (6.60)**  | 24.38 (0.2)        |
| Social Perception (0.541, 6)                                                               | 16.14 (4.91)  | 17.42 (4.93)**  | 16.94 (0.15)       |
| Ethical Taking (0.541, 6)                                                                  | 13.12 (4.47)  | 12.22 (4.71)**  | 12.55 (0.14)       |
| Financial Taking (0.758, 6)                                                                | 16.64 (6.52)  | 13.43 (5.36)**  | 14.63 (0.19)       |
| Health/Safety Taking (0.600, 6)                                                            | 19.2 (6.71)   | 16.74 (6.5)**   | 17.66 (0.21)       |
| Recreational Taking (0.838, 6)                                                             | 25.24 (9.48)  | 21.93 (9.1)**   | 23.18 (0.30)       |
| Social Taking (0.621, 6)                                                                   | 30.45 (5.49)  | 30.02 (5.54)    | 30.18 (0.17)       |
| <b>Probability Discounting Task<sup>1</sup> (h)</b><br><b>(0.836, 80)<sup>2</sup></b>      |               |                 |                    |
| <i>Log Transformed</i>                                                                     | 0.3244 (0.51) | 0.4606 (0.64)** | 0.4254 (0.02)      |
| <b>Probability Choice Questionnaire<sup>1</sup> (h)</b><br><b>(0.998, 100)<sup>3</sup></b> |               |                 |                    |
| <i>Log Transformed</i>                                                                     | 0.2167 (0.33) | 0.2537 (0.40)*  | 0.2409 (0.01)      |
| <b>BART<sup>4</sup></b>                                                                    | 32.91 (16.43) | 31.12 (16.89)   | 31.8 (0.51)        |

229 Participant Characteristics & Risk Measures by Sex. Note. Age and years of education are listed as mean (SEM). All  
 230 scores are listed as Mean (SD). <sup>1</sup> All measures with a skew value greater than 2 were log transformed. <sup>2</sup>(R<sup>2</sup>, N of  
 231 items), <sup>3</sup> (Consistency, N of items), <sup>4</sup> BART has no measure of internal reliability, Sex differences comparisons \* p <  
 232 0.05, \*\* p < 0.005

233

234 **3.3 Preliminary Analyses**

235 Before conducting the principal components analysis, we examined both the internal  
236 reliability of the DOSPERT (Table 1) and the correlations between measure subscales. The  $h$   
237 values of both probability discounting and probability choice measures were significantly  
238 correlated ( $r_s > 0.34, p < 0.005$ ) and inherently reflect the same content, and therefore were  
239 combined into a single measure by taking the arithmetic mean. The DOSPERT perceived risk  
240 and likelihood scores for each subscale were also correlated ( $r_s > 0.37, p < 0.005$ ) and therefore  
241 multiplied, yielding a composite of ‘risk orientation’, representing the weighting of risk  
242 attribution by likelihood of engaging in it.

### 243 **3.4 Full Sample Analysis**

244 Principal components analysis was conducted on the full sample utilizing an oblique  
245 rotation. The analysis yielded three components (Table 2). The first component accounted for  
246 27.3%, the second 14.3% and the third 12.7%, for a total of 54.3% of the variance. Component 1  
247 included DOSPERT ethical, health/safety, recreational and social risk and was thus labeled  
248 “*Lifestyle Risk Sensitivity*.” Component 2 consisted of three variables, the combined probability  
249 discounting measures, the inverse of DOSPERT financial risk and the SCFIRQ, and was thus  
250 labeled “*Financial Risk Sensitivity*.” Component 3 included the BART alone and was thus  
251 labeled “*Behavioral Risk Sensitivity*.”

### 252 **3.5 Sex Adjusted Analysis**

253 Principal components analysis was then conducted on the full sample using sex-adjusted  
254 measures of each risk measure. Sex adjusted measures were created by regressing each risk  
255 measure with sex and saving the standardized residuals. The analysis yielded three components  
256 (Table 2). The first component accounted for 27.2%, the second 14.0% and the third 12.7%, for a

257 total of 53.9% of the variance. Component 1 included DOSPERT ethical, health/safety,  
258 recreational and social risk and was thus labeled “*Lifestyle Risk Sensitivity.*” Component 2  
259 consisted of three variables, the probability discounting measure, the DOSPERT financial risk  
260 and the SCFIRQ, and was thus labeled “*Financial Risk Sensitivity.*” Component 3 included the  
261 BART alone and was thus labeled “*Behavioral Risk Sensitivity.*”

### 262 ***3.6 Sex Specific Analysis***

263 Principal components analysis was conducted on males and females separately. For both  
264 males and females, the analysis yielded three components (Table 4). For females, the first  
265 component accounted for 24.9% the second 15.4% and the third 12.9%, for a total of 53.3% of  
266 the variance. Component 1 included DOSPERT ethical, health/safety, recreational and social risk  
267 and was thus labeled “*Lifestyle Risk Sensitivity.*” Component 2 consisted of the combined  
268 probability discounting measures, the inverse of DOSPERT financial risk, and the SCFIRQ, and  
269 because these all involved finances this component was labeled “*Financial Risk Sensitivity.*”  
270 Component 3 included the BART alone and was thus labeled “*Behavioral Risk Sensitivity*”

271 For males, the first component accounted for 28.8% the second 14.1% and the third  
272 12.7%, for a total of 55.5% of the variance. Component 1 included DOSPERT financial,  
273 health/safety, recreational, ethical and social risk and was thus labeled “*Lifestyle Risk*  
274 *Sensitivity.*” Component 2 consisted of two variables, the combined probability discounting  
275 measures and the SCFIRQ, and because these both involved money this component was labeled  
276 “*Financial Risk Sensitivity.*” Component 3 included BART and the DOSPERT ethical risk  
277 subscale was thus labeled “*Behavioral Risk Sensitivity*”.

278

279  
280  
281  
282  
283

**Table 2.**

| Measure Outcome                  | Full Sample Loadings                    |                                         |                                          | Sex-Adjusted PCA Loadings               |                                         |                                    | Male PCA Loadings                       |                                         |                                          | Female PCA Loadings                     |                                         |                                    |
|----------------------------------|-----------------------------------------|-----------------------------------------|------------------------------------------|-----------------------------------------|-----------------------------------------|------------------------------------|-----------------------------------------|-----------------------------------------|------------------------------------------|-----------------------------------------|-----------------------------------------|------------------------------------|
|                                  | Component 1: Lifestyle Risk Sensitivity | Component 2: Financial Risk Sensitivity | Component 3: Behavioral Risk Sensitivity | Component 1: Lifestyle Risk Sensitivity | Component 2: Financial Risk Sensitivity | Component 3: BART Risk Sensitivity | Component 1: Lifestyle Risk Sensitivity | Component 2: Financial Risk Sensitivity | Component 3: Behavioral Risk Sensitivity | Component 1: Lifestyle Risk Sensitivity | Component 2: Financial Risk Sensitivity | Component 3: BART Risk Sensitivity |
| Combined Probability Discounting | 0.02                                    | <b>0.546</b>                            | -0.149                                   | 0.022                                   | <b>0.56</b>                             | -0.208                             | 0.267                                   | <b>0.704</b>                            | 0.054                                    | -0.090                                  | <b>0.478</b>                            | <b>0.325</b>                       |
| DOSP ERT Ethical Risk            | <b>0.557</b>                            | -0.181                                  | -0.043                                   | <b>0.558</b>                            | -0.181                                  | -0.02                              | <b>0.319</b>                            | -0.239                                  | <b>-0.409</b>                            | <b>0.639</b>                            | -0.025                                  | -0.066                             |
| DOSP ERT Financial Risk          | 0.277                                   | <b>-0.643</b>                           | -0.168                                   | 0.298                                   | <b>-0.607</b>                           | -0.203                             | <b>0.530</b>                            | <b>-0.445</b>                           | 0.074                                    | 0.296                                   | <b>-0.633</b>                           | 0.212                              |
| DOSP ERT Health & Safety Risk    | <b>0.745</b>                            | 0.003                                   | 0.198                                    | <b>0.758</b>                            | 0.042                                   | 0.206                              | <b>0.595</b>                            | -0.146                                  | -0.067                                   | <b>0.800</b>                            | 0.244                                   | -0.231                             |
| DOSP ERT Recreational Risk       | <b>0.662</b>                            | -0.126                                  | -0.034                                   | <b>0.672</b>                            | -0.094                                  | -0.044                             | <b>0.778</b>                            | 0.022                                   | -0.114                                   | <b>0.581</b>                            | -0.199                                  | 0.034                              |
| DOSP ERT Social Risk             | <b>0.645</b>                            | 0.209                                   | -0.071                                   | <b>0.628</b>                            | 0.156                                   | -0.076                             | <b>0.660</b>                            | 0.259                                   | 0.082                                    | <b>0.539</b>                            | -0.026                                  | 0.266                              |
| SCFIR Q                          | 0.075                                   | <b>0.814</b>                            | 0.069                                    | 0.075                                   | <b>0.812</b>                            | 0.093                              | -0.249                                  | <b>0.707</b>                            | -0.065                                   | 0.175                                   | <b>0.824</b>                            | 0.009                              |
| BART                             | 0.044                                   | -0.009                                  | <b>0.962</b>                             | 0.043                                   | -0.012                                  | <b>0.941</b>                       | 0.051                                   | -0.131                                  | <b>0.946</b>                             | 0.028                                   | -0.022                                  | <b>-0.872</b>                      |

284 Principal Components Analysis. All values over 0.3 are in bold. Note. component loadings taken from the pattern  
285 matrix

286

287

288

289

#### 290 **4. Discussion & Conclusion**

291 This principal component analysis of several indices of risk-taking revealed a latent  
292 structure of three distinct components of risk-taking behavior. Based on their content, we labeled  
293 these: “*Lifestyle Risk Sensitivity*”, which included ethical, recreational, health and safety, and  
294 social risk, “*Financial Risk Sensitivity*”, which included the two measures of monetary risk as  
295 measured by probability discounting and “*Behavioral Risk Sensitivity*”, which consisted only of  
296 the BART. Males and females differed on most of the measures: Males reported to be more  
297 likely to engage in risky behaviors, and females reported a higher perception of risk. A sex-  
298 adjusted principal components analysis revealed an identical three component structure to the  
299 full sample analysis. Similar components were extracted for both males and females analyzed  
300 separately, except that the DOSPERT ethical subscale loaded onto the *Behavioral Risk*  
301 *Sensitivity* component in males, but not females. Overall, our findings support the existence of  
302 three similar underlying components of risk-taking behavior measures: *Lifestyle, Financial and*  
303 *Behavioral Risk Sensitivity*.

304 These findings support the current view that risk-taking is multidimensional. Although  
305 risk-taking was previously considered a unitary personality trait (i.e., risk-taking or risk averse) a  
306 growing body of evidence suggests that risk-taking consists of different components, or domains  
307 (Blais & Weber, 2001; 2002; 2006). Our findings support this idea, indicating that risky lifestyle  
308 behaviors (health, safety etc.) may not be related to risky financial behaviors, and that the BART  
309 assesses a separate, unrelated dimension.

310 Furthermore, our findings add to our understanding of sex differences within risk taking  
311 behaviors. Typically, males are more inclined to take risks across a variety of domains, including  
312 financial to lifestyle, and females are more risk averse (Fatkin et al., 1985; Powell et al., 1997;  
313 Pawlowski et al., 2008; Charness et al., 2012). This was also seen in our results. Females  
314 perceived all domains of the DOSPERT risk subscales, except social, to be significantly riskier  
315 than males, and they scored significantly lower on likelihood to take the risks in all domains  
316 compared to males. Thus, females were more risk averse and perceived risks as riskier.  
317 Interestingly the sex-adjusted PCA indicated nearly the same three components as our full  
318 sample unadjusted PCA, suggesting similar underlying factor structure in men and women.  
319 When PCA's were conducted separately for men and women we found one minor difference in  
320 component loadings—the DOSPERT ethical variable loaded onto "*Behavioral Risk Sensitivity*"  
321 rather than "*Lifestyle Risk Sensitivity*" in males but not in females. Whether this difference is  
322 specific to this sample or reflects a general sex difference is not known.

323 Similar to more recent work evaluating the Balloon Analogue Risk Task, in our study,  
324 behavior on the BART was not related to other indices of risk. During the development of the  
325 BART, Lejuez et al (2002) showed that it was correlated with several real-life risk-taking  
326 behaviors including addictive, health, and safety risk behaviors. Since then there have been  
327 numerous reports that the BART differentiates populations thought to be risk-takers from non-  
328 risk-takers (e.g., smokers vs nonsmokers, individuals high on self-reported impulsivity or  
329 psychopathy, jailed inmates, cocaine users; Lejuez et al. 2003, Hunt et al. 2005, Lejuez et al.  
330 2007, Swogger et al. 2010, Tull et al. 2009). However, these relationships have not always been  
331 consistently present and some studies have even reported opposite relationships (Courtney et al.  
332 2012; Ryan et al. 2013). Furthermore, prior work has also showed that neither the BART nor the



333 Iowa Gambling Task were correlated with self-report measures of impulsivity (BIS-11, I-7  
334 Impulsivity, MPQ Constraint) or sensation seeking (I-7 Venturesomeness; Reynolds et al.,  
335 2006). Reynolds et al. concluded that “self-report and behavioral tasks probably measure  
336 different constructs, and... even among the behavioral measures, different tasks measure  
337 different, perhaps unrelated, components of impulsive behavior” (Reynolds et al., 2006, p. 305–  
338 306). The present study is one of the first to investigate the relations among survey and  
339 behavioral measures of risk-taking using a latent variable approach in a well-powered sample of  
340 adolescents. The findings supported the discrepancy between the BART, a behavioral task, and  
341 self-report tasks by revealing the unique latent component BART loaded onto by itself.

342         Within the financial risk category, our findings with probability discounting raised a  
343 methodological issue: We measured probability discounting using both a behavioral task and a  
344 self-report questionnaire, and the results were highly correlated. In this case, the distinction  
345 between ‘behavioral’ measure and ‘self-report’ measure is not completely clear because the  
346 content of the choices using the two methods was similar (i.e., certain smaller amount of money  
347 vs larger probabilistic amount of money). Yet, the high correlation between the measures  
348 suggests that the participants’ behavior was driven by the content rather than the form of the  
349 measure. In our study, both probability discounting measures were also correlated with the self-  
350 report measure of financial risk-taking, suggesting that there is a general financial risk-taking  
351 underlying construct that is dissociable from non-financial risk. Our findings diverge slightly  
352 from the findings by Frey et al (2017), who used many more measures (39 measures, compared  
353 to our 7) to derive the factor structure of different indices of risk. They found a weak correlation  
354 between propensity (self-report) and behavioral measures of risk, but they did find an overall  
355 general risk factor that was related to frequency of engaging in real-life risky behaviors like

356 smoking. Of course, the problem with examining smoking and other risk substance use is that it  
357 includes processes that may in fact be a cause of risk phenotypes.

358         Our study extended knowledge about risky behaviors in several ways. First, we  
359 identified three distinct constructs reflecting apparently unrelated forms of risk-taking behavior:  
360 lifestyle, financial and behavioral risk sensitivity. Notably, the financial construct was comprised  
361 of both self-report measures and behavioral tasks, providing good support for a true underlying  
362 construct. Second, we ascertained these constructs in participants who were relatively  
363 homogeneous in terms of age, absence of psychiatric symptomatology or addictive behaviors,  
364 thereby minimized the possible confounds that these variables might contribute to the data. At  
365 the same time, however, the relative homogeneity of our sample does raise a question about  
366 whether these same constructs would exist in more mixed populations. In addition, although we  
367 used an extensive battery of measures, not every measure of risk preference was represented.  
368 Future work utilizing more, and different measures of risk-taking behavior, both self-report and  
369 behavioral, such as the Risk Perception Scale (Benthin et al., 1993), in addition to the  
370 DOSPERT, and the Wheel of Fortune Task (Ernst, M. et al., 2004), in more heterogeneous  
371 samples, such as individuals of different ethnicities and with an illicit drug use history, will help  
372 to identify the true biobehavioral constructs underlying these behaviors.

373

## **Acknowledgements**

We thank Drs. Jessica Weafer and Joshua Gray for their contributions to the data collection and guidance throughout.

**Funding** This work was partially supported by National Institutes of Health grant R01 DA032015 (de Wit, Palmer, MacKillop) and the Peter Boris Chair in Addictions Research (MacKillop).

## References

- Aizcorbe, A. M., Kennickell, A. B., & Moore, K. B. (2003). Recent changes in U.S. family finances: Results from the 1998 and 2001 Survey of Consumer Finances. *Federal Reserve Bulletin*, 89, 1–32.
- Bechara, A. (2003). Risky business: emotion, decision-making, and addiction. *Journal of Gambling Studies*, 19(1), 23–51.
- Benjamin DJ, Cesarini D, van der Loos MJHM, Dawes CT, Koellinger PD, Magnusson PKE. (2012). The genetic architecture of economic and political preferences. *Proceedings of the National Academy of Sciences*, 21, 8026–8031.
- Benthin, A., Slovic, P., Severson, H. (1993). A Psychometric study of adolescent risk perception *J. Adolesc.*, 16 (2) (1993), 153-168
- Blais, Ann-R & Weber, Elke U. (2001), Domain-Specificity and Gender Differences in Decision Making, *Risk, Decision and Policy*, 6, 47-69.
- Blais, Ann-R, & Weber, Elke U. (2006). A Domain-Specific Risk-Taking (DOSPERT) scale for adult populations. *Judgement and Decision Making*, 1(1), 33–47.
- Bromiley, P., & P. Curley, S. (1992). Personality and Individual Differences in Risk-taking. *Risk Taking Behavior*, 87–132.
- Byrnes, J. P., Miller, D. C., & Schafer, W. D. (1999). Gender differences in risk taking: A meta-analysis. *Psychological Bulletin*, 125(3), 367–383.
- Charness, G., & Gneezy, U. (2012). Strong Evidence for Gender Differences in Risk Taking. *Journal of Economic Behavior & Organization*, 83(1), 50–58.
- Courtney, K. E., Arellano, R., Barkley-Levenson, E., Gálvan, A., Poldrack, R. A., Mackillop, J., ... Ray, L. A. (2012). The relationship between measures of impulsivity and alcohol misuse:

- an integrative structural equation modeling approach. *Alcoholism, Clinical and Experimental Research*, 36(6), 923–931.
- Duijvenvoorde, A. C. K. van, Huizenga, H. M., Somerville, L. H., Delgado, M. R., Powers, A., Weeda, W. D., ... Figner, B. (2015). Neural Correlates of Expected Risks and Returns in Risky Choice across Development. *Journal of Neuroscience*, 35(4), 1549–1560.
- Ernst, M., Nelson, E. E., McClure, E. B., Monk, C. S., Munson, S., Eshel, N., ... Pine, D. S. (2004). Choice selection and reward anticipation: an fMRI study. *Neuropsychologia*, 42(12), 1585–1597.
- Eysenck, S. B. G., & Eysenck, H. J. (1977). The place of impulsiveness in a dimensional system of personality description. *British Journal of Social and Clinical Psychology*, 16(1), 57–68.
- Frey, R., Pedroni, A., Mata, R., Rieskamp, J., & Hertwig, R. (2017). Risk preference shares the psychometric structure of major psychological traits. *Science Advances*, 3(10), e1701381.
- Horvath, P., & Zuckerman, M. (1993). Sensation seeking, risk appraisal, and risky behavior. *Personality and Individual Differences*, 14(1), 41–52.
- Hudgens, G. A., & Fatkin, L. T. (1985). Sex Differences in Risk Taking: Repeated Sessions on a Computer-Simulated Task. *The Journal of Psychology*, 119(3), 197–206.
- Hunt, M. K., Hopko, D. R., Bare, R., Lejuez, C. W., & Robinson, E. V. (2005). Construct Validity of the Balloon Analog Risk Task (BART): Associations With Psychopathy and Impulsivity. *Assessment*, 12(4), 416–428.
- Josef, A. K., Richter, D., Samanez-Larkin, G. R., Wagner, G. G., Hertwig, R., & Mata, R. (2016). Stability and Change in Risk-Taking Propensity Across the Adult Lifespan. *Journal of Personality and Social Psychology*, 111(3), 430–450.

- Leigh, B. C. (1999). Peril, chance, adventure: concepts of risk, alcohol use and risky behavior in young adults. *Addiction (Abingdon, England)*, *94*(3), 371–383.
- Lejuez, C. W., Aklin, W., Daughters, S., Zvolensky, M., Kahler, C., & Gwadz, M. (2007). Reliability and Validity of the Youth Version of the Balloon Analogue Risk Task (BART–Y) in the Assessment of Risk-Taking Behavior Among Inner-City Adolescents. *Journal of Clinical Child & Adolescent Psychology*, *36*(1), 106–111.
- Lejuez, C. W., Aklin, W. M., Jones, H. A., Richards, J. B., Strong, D. R., Kahler, C. W., & Read, J. P. (2003). The balloon analogue risk task (BART) differentiates smokers and nonsmokers. *Experimental and Clinical Psychopharmacology*, *11*(1), 26-33.
- Lejuez, C. W., Aklin, W. M., Zvolensky, M. J., & Pedulla, C. M. (2003). Evaluation of the Balloon Analogue Risk Task (BART) as a predictor of adolescent real-world risk-taking behaviours. *Journal of Adolescence*, *26*(4), 475–479.
- Lejuez, C. W., Read, J. P., Kahler, C. W., Richards, J. B., Ramsey, S. E., Stuart, G. L., ... Brown, R. A. (2002). Evaluation of a behavioral measure of risk taking: the Balloon Analogue Risk Task (BART). *Journal of Experimental Psychology. Applied*, *8*(2), 75–84.
- Linnér, R. K., Biroli, P., Kong, E., Meddens, S. F. W., Wedow, R., Fontana, M. A., ... Beauchamp, J. P. (2018). Genome-wide study identifies 611 loci associated with risk tolerance and risky behaviors. *BioRxiv*, 261081.
- MacKillop, J., Weafer, J., Gray, J., Oshri, A., Palmer, A., & de Wit, H. (2016). The Latent Structure of Impulsivity: Impulsive Choice, Impulsive Action, and Impulsive Personality Traits. *Psychopharmacology*, *233*(18), 3361–3370.
- Madden, G. J., & Bickel, W. K. (Eds.). (2010). *Impulsivity: the behavioral and neurological science of discounting* (1st ed). Washington, DC: American Psychological Association.

- Nasrallah, N. A., Yang, T. W. H., & Bernstein, I. L. (2009). Long-term risk preference and suboptimal decision making following adolescent alcohol use. *Proceedings of the National Academy of Sciences*, *106*(41), 17600–17604.
- Pawlowski, B., Atwal, R., & Dunbar, R. I. M. (2008). Sex Differences in Everyday Risk-Taking Behavior in Humans. *Evolutionary Psychology*, *6*(1)
- Powell, M., & Ansic, D. (1997). Gender differences in risk behaviour in financial decision-making: An experimental analysis. *Journal of Economic Psychology*, *18*(6), 605–628.
- Reynolds, B., Ortengren, A., Richards, J. B., & de Wit, H. (2006). Dimensions of impulsive behavior: Personality and behavioral measures. *Personality and Individual Differences*, *40*(2), 305–315.
- Richards, J. B., Zhang, L., Mitchell, S. H., & de Wit, H. (1999). Delay or probability discounting in a model of impulsive behavior: effect of alcohol. *Journal of the Experimental Analysis of Behavior*, *71*(2), 121–143.
- Ryan, K. K., Mackillop, J., & Carpenter, M. J. (2013). The relationship between impulsivity, risk-taking propensity and nicotine dependence among older adolescent smokers. *Addictive Behaviors*, *38*(1), 1431–1434.
- Swogger, M. T., Walsh, Z., Lejuez, C. W., & Kosson, D. S. (2010). Psychopathy and Risk Taking among Jailed Inmates. *Criminal Justice and Behavior*, *37*(4), 439–452.
- Tull, M. T., Trotman, A., Duplinsky, M. S., Reynolds, E. K., Daughters, S. B., Potenza, M. N., & Lejuez, C. W. (2009). The Effect of Posttraumatic Stress Disorder on Risk-Taking

Propensity among Crack/Cocaine Users in Residential Substance Abuse Treatment.

*Depression and Anxiety*, 26(12), 1158–1164.

Weber, E. U., Blais, A.-R., & Betz, N. E. (2002). A domain-specific risk-attitude scale:

measuring risk perceptions and risk behaviors. *Journal of Behavioral Decision Making*,

15(4), 263–290.

Zuckerman, M., & Kuhlman, D. M. (2000). Personality and Risk-Taking: Common Bisocial

Factors. *Journal of Personality*, 68(6), 999–1029.



*Supplementary Material*

**Supplementary Table 1.**

| Measure                          | Combined Probability Discounting | DOSPERT Ethical | DOSPERT Financial | DOSPERT Health/safety | DOSPERT Recreational | DOSPERT Social | SCFIRQ       | BART         |
|----------------------------------|----------------------------------|-----------------|-------------------|-----------------------|----------------------|----------------|--------------|--------------|
| Combined Probability Discounting | <b>1.000</b>                     |                 |                   |                       |                      |                |              |              |
| DOSPERT Ethical                  | <b>-0.132**</b>                  | <b>1.000</b>    |                   |                       |                      |                |              |              |
| DOSPERT Financial                | <b>-0.131**</b>                  | <b>0.284**</b>  | <b>1.000</b>      |                       |                      |                |              |              |
| DOSPERT Health/safety            | <b>-0.106*</b>                   | <b>0.362**</b>  | <b>0.194**</b>    | <b>1.000</b>          |                      |                |              |              |
| DOSPERT Recreational             | <b>-0.117**</b>                  | <b>0.196**</b>  | <b>0.326**</b>    | <b>0.354**</b>        | <b>1.000</b>         |                |              |              |
| DOSPERT Social                   | -0.003                           | <b>0.151**</b>  | <b>0.148**</b>    | <b>0.184**</b>        | <b>0.264**</b>       | <b>1.000</b>   |              |              |
| SCFIRQ                           | <b>0.162**</b>                   | <b>-0.125**</b> | <b>-0.397**</b>   | <b>-0.092**</b>       | <b>-0.142**</b>      | -0.048         | <b>1.000</b> |              |
| BART                             | -0.005                           | -0.050          | -0.038            | 0.039                 | -0.030               | -0.013         | -0.007       | <b>1.000</b> |

Full sample correlation matrix. Note. Zero-order Pearson's correlations among measures and subscales of risk taking, \* p<.05, \*\* p<.005

**Supplementary Table 2.**

| Measure                          | Combined Probability Discounting | DOSPERT Ethical | DOSPERT Financial | DOSPERT Health/safety | DOSPERT Recreational | DOSPERT Social | SCFIRQ          | BART         |
|----------------------------------|----------------------------------|-----------------|-------------------|-----------------------|----------------------|----------------|-----------------|--------------|
| Combined Probability Discounting | <b>1.000</b>                     | <b>-0.144**</b> | <b>-0.138**</b>   | <b>-0.103*</b>        | <b>-0.166**</b>      | -0.006         | <b>0.137**</b>  | -0.016       |
| DOSPERT Ethical                  | <b>-0.108*</b>                   | <b>1.000</b>    | <b>0.272**</b>    | <b>0.393**</b>        | <b>0.147**</b>       | <b>0.165**</b> | -0.039          | -0.008       |
| DOSPERT Financial                | -0.086                           | <b>0.309**</b>  | <b>1.000</b>      | <b>0.105*</b>         | <b>0.272**</b>       | <b>0.168**</b> | <b>-0.296**</b> | -0.037       |
| DOSPERT Health/safety            | <b>-0.100*</b>                   | <b>0.314**</b>  | <b>0.293**</b>    | <b>1.000</b>          | <b>0.313**</b>       | <b>0.212**</b> | 0.052           | 0.076        |
| DOSPERT Recreational             | -0.014                           | <b>0.269**</b>  | <b>0.387**</b>    | <b>0.409**</b>        | <b>1.000</b>         | <b>0.256**</b> | <b>-0.079*</b>  | 0.013        |
| DOSPERT Social                   | -0.023                           | <b>0.135**</b>  | <b>0.187**</b>    | <b>0.161**</b>        | <b>0.300**</b>       | <b>1.000</b>   | -0.073          | -0.006       |
| SCFIRQ                           | <b>0.176**</b>                   | <b>-0.246**</b> | <b>-0.467**</b>   | <b>-0.267**</b>       | <b>-0.207**</b>      | -0.069         | <b>1.000</b>    | -0.039       |
| BART                             | 0.032                            | <b>-0.121**</b> | -0.07             | -0.03                 | <b>-0.107*</b>       | -0.011         | 0.067           | <b>1.000</b> |

Correlation matrix by sex. Note. Zero-order Pearson's correlations among measures and subscales of risk taking, Males below middle diagonal, Females above middle diagonal, \* p<.05, \*\* p<.005

**Supplementary Table 3.**

**A.**

| <b>Component</b>                   | <i>Lifestyle Risk Sensitivity</i> | <i>Financial Risk Sensitivity</i> | <i>Behavioral Risk Sensitivity</i> |
|------------------------------------|-----------------------------------|-----------------------------------|------------------------------------|
| <i>Lifestyle Risk Sensitivity</i>  | <b>1.000</b>                      | -0.01                             | -0.078                             |
| <i>Financial Risk Sensitivity</i>  | -0.204**                          | <b>1.000</b>                      | -0.21**                            |
| <i>Behavioral Risk Sensitivity</i> | -0.077                            | -0.022                            | <b>1.000</b>                       |

Component Correlations: Full Sample & Sex Adjusted Sample. Note. Zero-order Pearson's correlations among measures and subscales of risk taking, Sex adjusted upper right hand part of table, full sample unadjusted lower left hand part of table, \* p<.05, \*\* p<.005

**B.**

| <b>Component</b>                   | <i>Lifestyle Risk Sensitivity</i> | <i>Financial Risk Sensitivity</i> | <i>Behavioral Risk Sensitivity</i> |
|------------------------------------|-----------------------------------|-----------------------------------|------------------------------------|
| <i>Lifestyle Risk Sensitivity</i>  | <b>1.000</b>                      | 0.004                             | 0.010                              |
| <i>Financial Risk Sensitivity</i>  | -0.161*                           | <b>1.000</b>                      | -0.181**                           |
| <i>Behavioral Risk Sensitivity</i> | -0.113*                           | 0.161**                           | <b>1.000</b>                       |

Component Correlations: Sex Specific Samples Note. Zero-order Pearson's correlations among measures and subscales of risk taking, Females upper right hand part of table, Males lower left hand part of table, \* p<.05, \*\* p<.005

### Supplementary Figure 1.

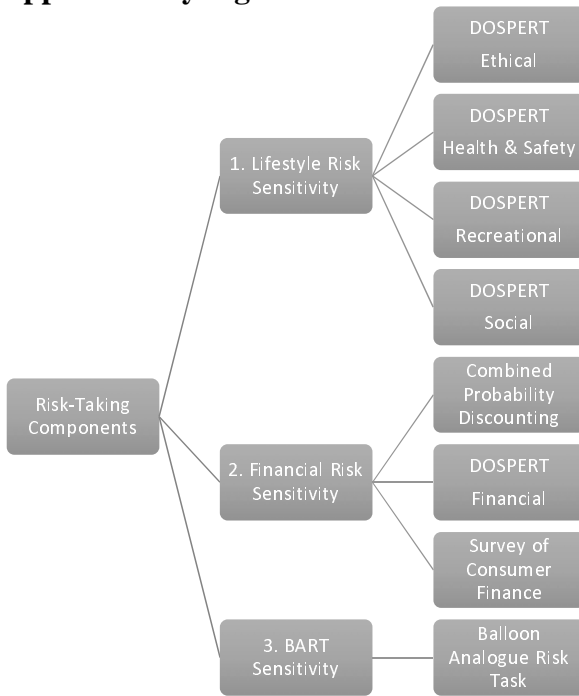

### Full Sample

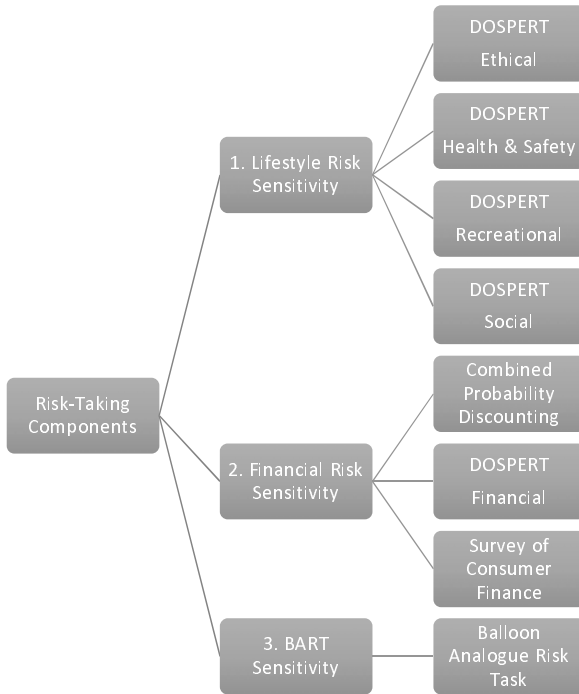

### Females

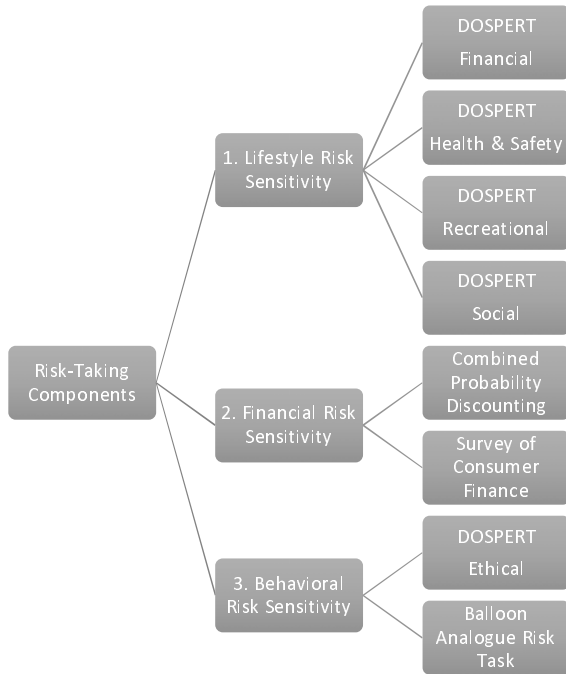

*Males*

Structural Depiction of Three Latent Components of Risk-Taking Measures
